# Supplementary material for: Sensitive detection of dissolved oxygen in seawater by fluorometric sensing based on ZnO-NH2@SiO2 QDs
Source: Royal Society of Chemistry journal article supplement (doi:10.1039/d3tc04049f), 2023-12-19
Supplement: d3tc04049f1.pdf [file d3tc04049f1.pdf]

## Supporting Information

### **Sensitive detection of dissolved oxygen in seawater by fluorometric sensing based on ZnO-NH<sub>2</sub>@SiO<sub>2</sub> QDs**

Mengmeng Cao<sup>a</sup>, Hang Lv<sup>a, b</sup>, Song Hu<sup>a</sup>, Guohong Zhou<sup>a, \*</sup>

*<sup>a</sup> Shanghai Institute of Ceramics, Chinese Academy of Sciences,  
Shanghai 200050, P.R. China.*

*<sup>b</sup> Center of Materials Science and Optoelectronics Engineering,  
University of Chinese Academy of Sciences, Beijing, 100049, China.*

\*Corresponding author.

E-mail: sic\_zhough@mail.sic.ac.cn (Prof. Guohong Zhou)

Tel.: +86 21 69906230

Address: 588 N. Heshuo Rd., Shanghai, China.

**Table S1** Common elements and concentrations in seawater (S=35‰).

| Ions                          | Concentrations (g/Kg) |
|-------------------------------|-----------------------|
| Cl <sup>-</sup>               | 19.354                |
| SO <sub>4</sub> <sup>2-</sup> | 2.712                 |
| Br <sup>-</sup>               | 0.0673                |
| F <sup>-</sup>                | 0.0013                |
| B                             | 0.0045                |
| Na <sup>+</sup>               | 10.77                 |
| Mg <sup>2+</sup>              | 1.290                 |
| HCO <sub>3</sub> <sup>-</sup> | 0.142                 |
| Ca <sup>2+</sup>              | 0.4121                |
| K <sup>+</sup>                | 0.399                 |
| Sr <sup>2+</sup>              | 0.0079                |

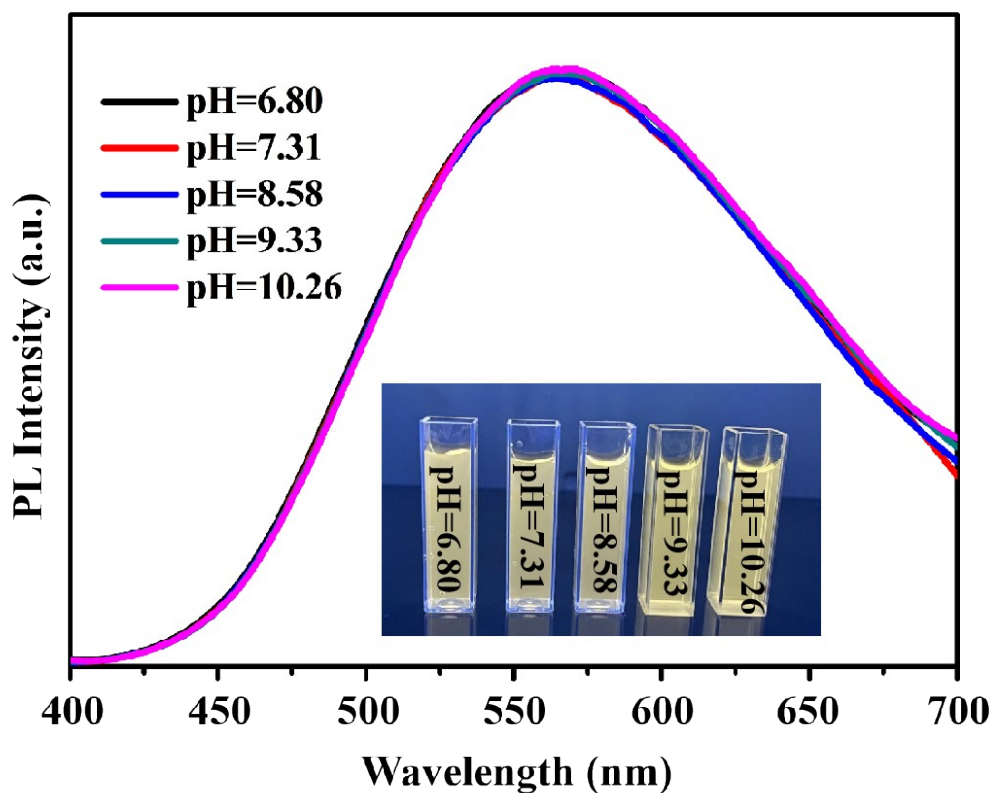

**Figure S1.** PL spectra and photographs (illustration) of as-prepared ZNS-1 QDs in the pH range of 6.80 to 10.26 under excitation of 365 nm.

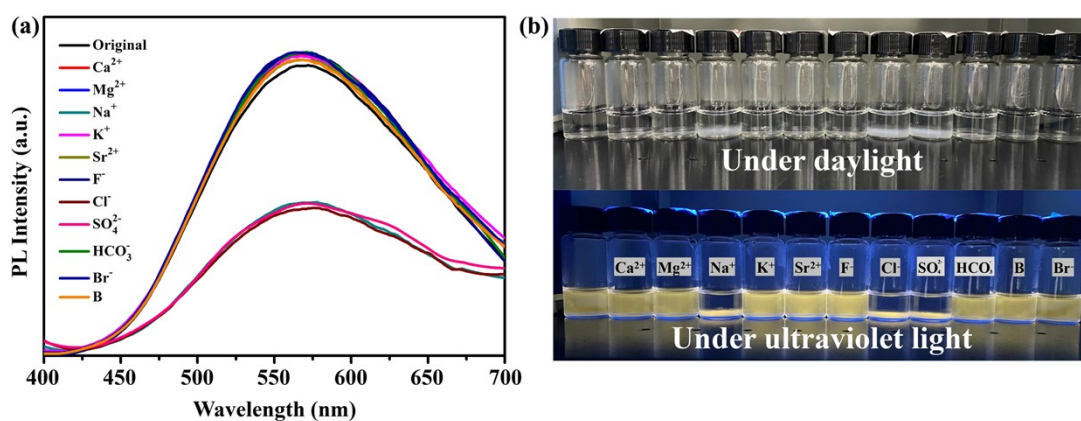

**Figure S2.** Photographs under daylight and ultraviolet light (a), and PL spectra (b) of as-prepared ZNS-1 QDs dispersed in the different ion solutions under excitation of 365 nm.

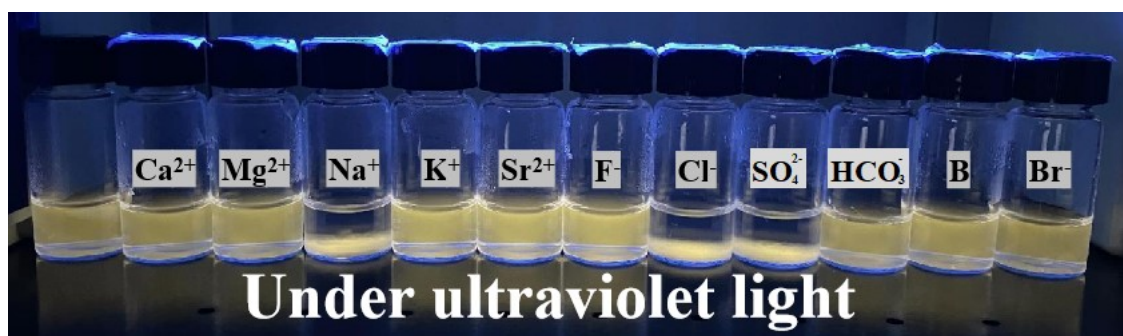

**Figure S3.** Photographs under ultraviolet light of as-prepared ZnO QDs dispersed in the different ion solutions.

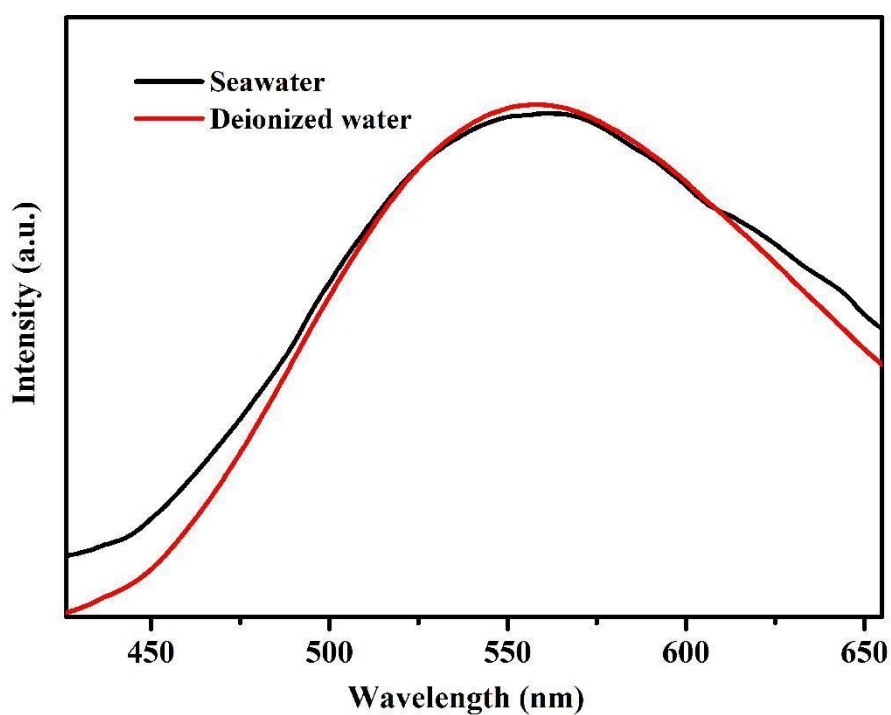

**Figure S4.** PL spectra of as-prepared ZNS-2 QDs respectively dispersed in 80 mL deionized water and seawater under 365 nm excitation.
